# Supplementary material
Source: MDPI journal article supplement (https://www.mdpi.com/2073-445X/10/3/230)
Supplement: s1 [file s1]

## Appendix A. Supplementary material

# Multielement Contamination of Land in the Margin of Highways

Dimitrios E. Alexakis

Laboratory of Geoenvironmental Science and Environmental Quality Assurance, Department of Civil Engineering, School of Engineering, University of West Attica, 250 Thivon & P.Ralli Str, 12244 Athens, Greece; d.alexakis@uniwa.gr; Tel.: +30-210-5381256

**Citation:** Alexakis, D. Multielement Contamination of Land in the Margin of Highways. *Land* **2021**, *10*, 230. <https://doi.org/10.3390/land10030230>

Received: 27 January 2021

Accepted: 22 February 2021

Published: 25 February 2021

**Publisher's Note:** MDPI stays neutral with regard to jurisdictional claims in published maps and institutional affiliations.

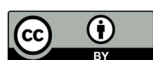

**Copyright:** © 2021 by the authors. Licensee MDPI, Basel, Switzerland. This article is an open access article distributed under the terms and conditions of the Creative Commons Attribution (CC BY) license (<http://creativecommons.org/licenses/by/4.0/>).

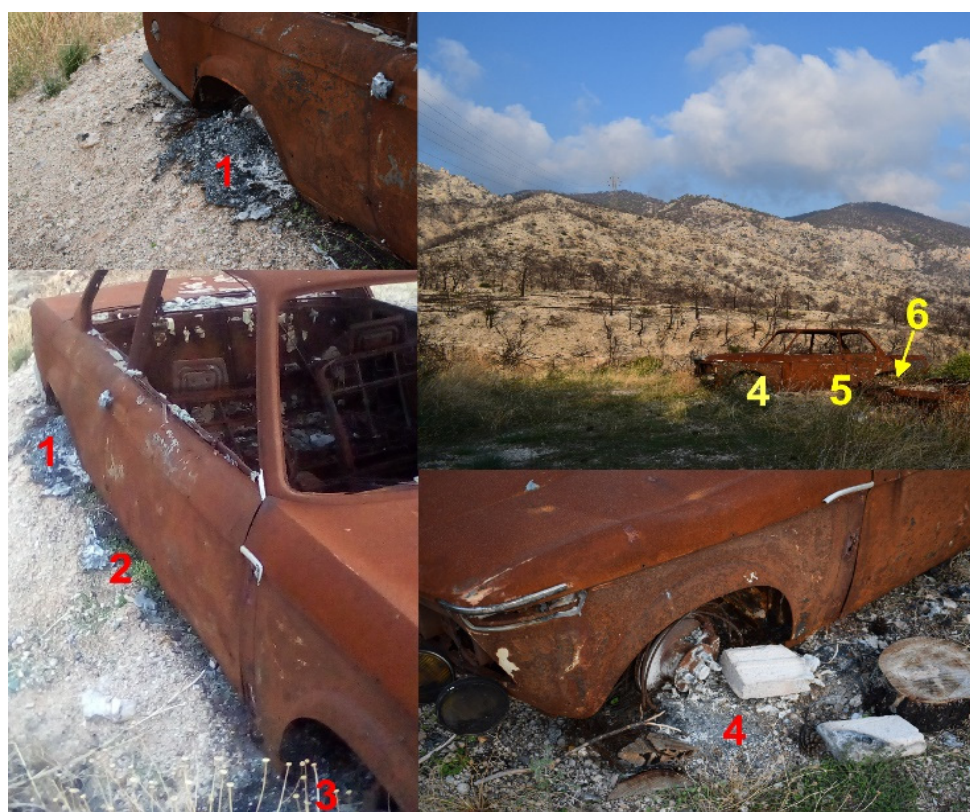

**Figure S1.** Burned car found in the study area and locations (1,2,3,4,5,6) of the sub-samples of car ash.
